# Supplementary material for: Preparation of acid aluminum phosphate solutions for metakaolin phosphate geopolymer binder
Source: Royal Society of Chemistry journal article supplement (doi:10.1039/d1ra05433c), 2021-01-01
Supplement: d1ra05433c1.pdf [file d1ra05433c1.pdf]

Supplementary files

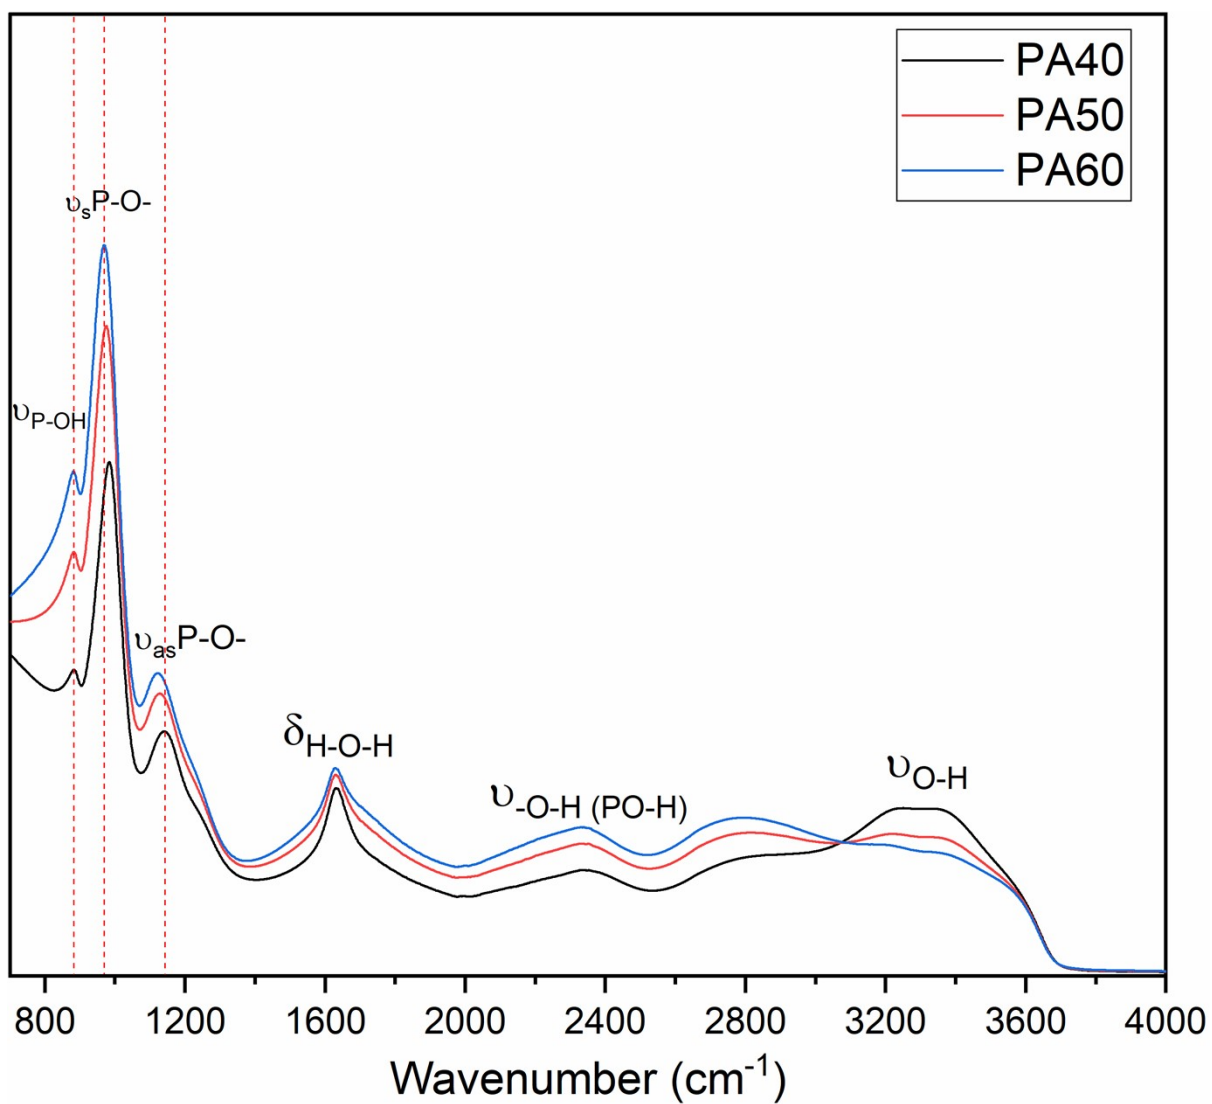

Figure S1. ATR-FTIR spectra of phosphoric acid solution at different concentration

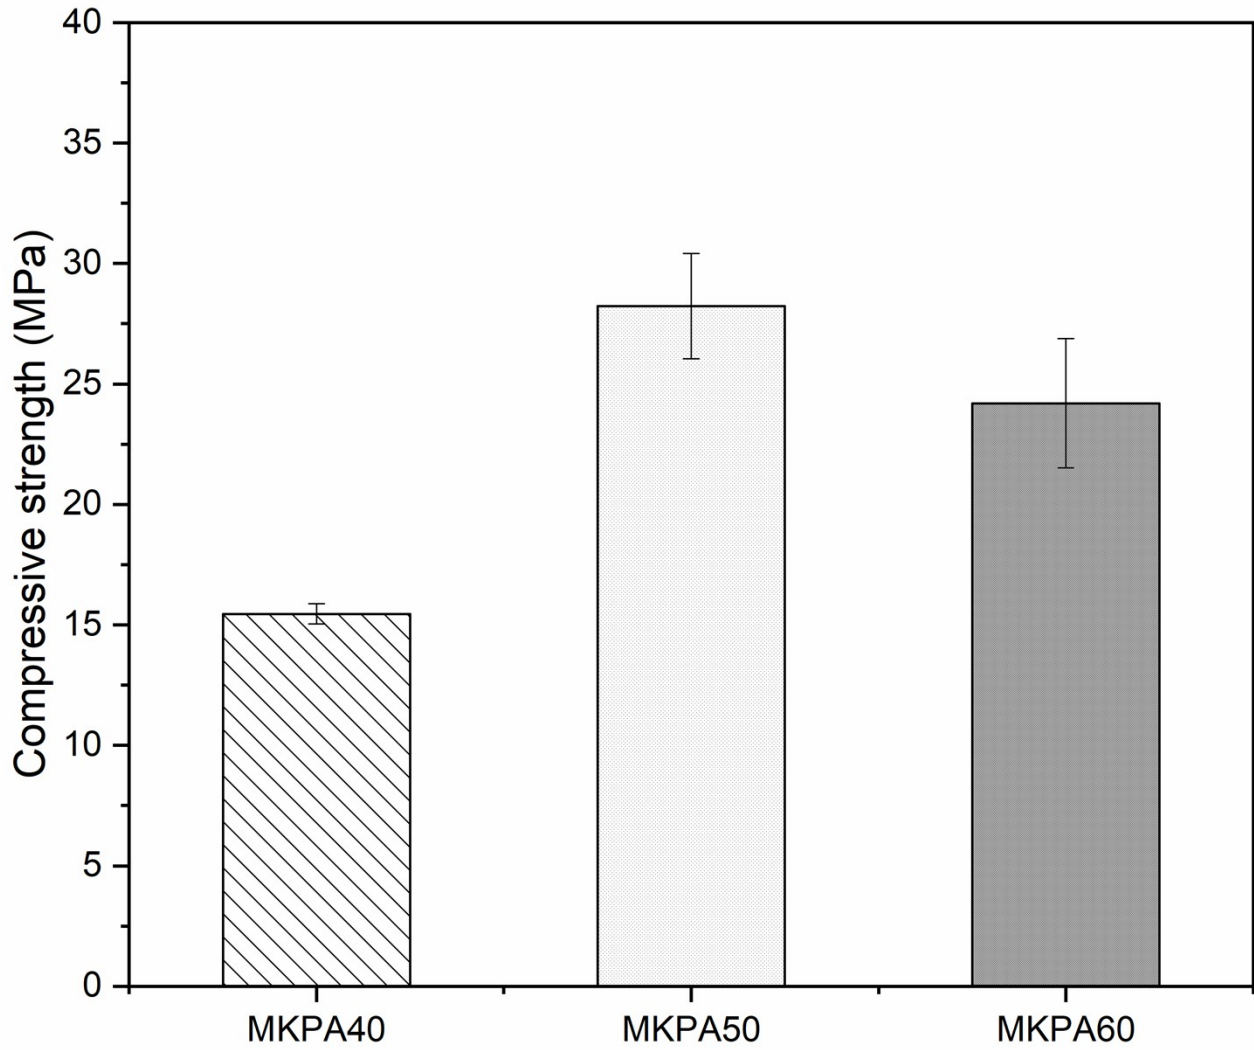

Figure S2. 28-days compressive strength of MK-phosphate geopolymer binder obtain with different concentrations of phosphoric acid (40 wt.%, 50wt.%, and 60wt.%).

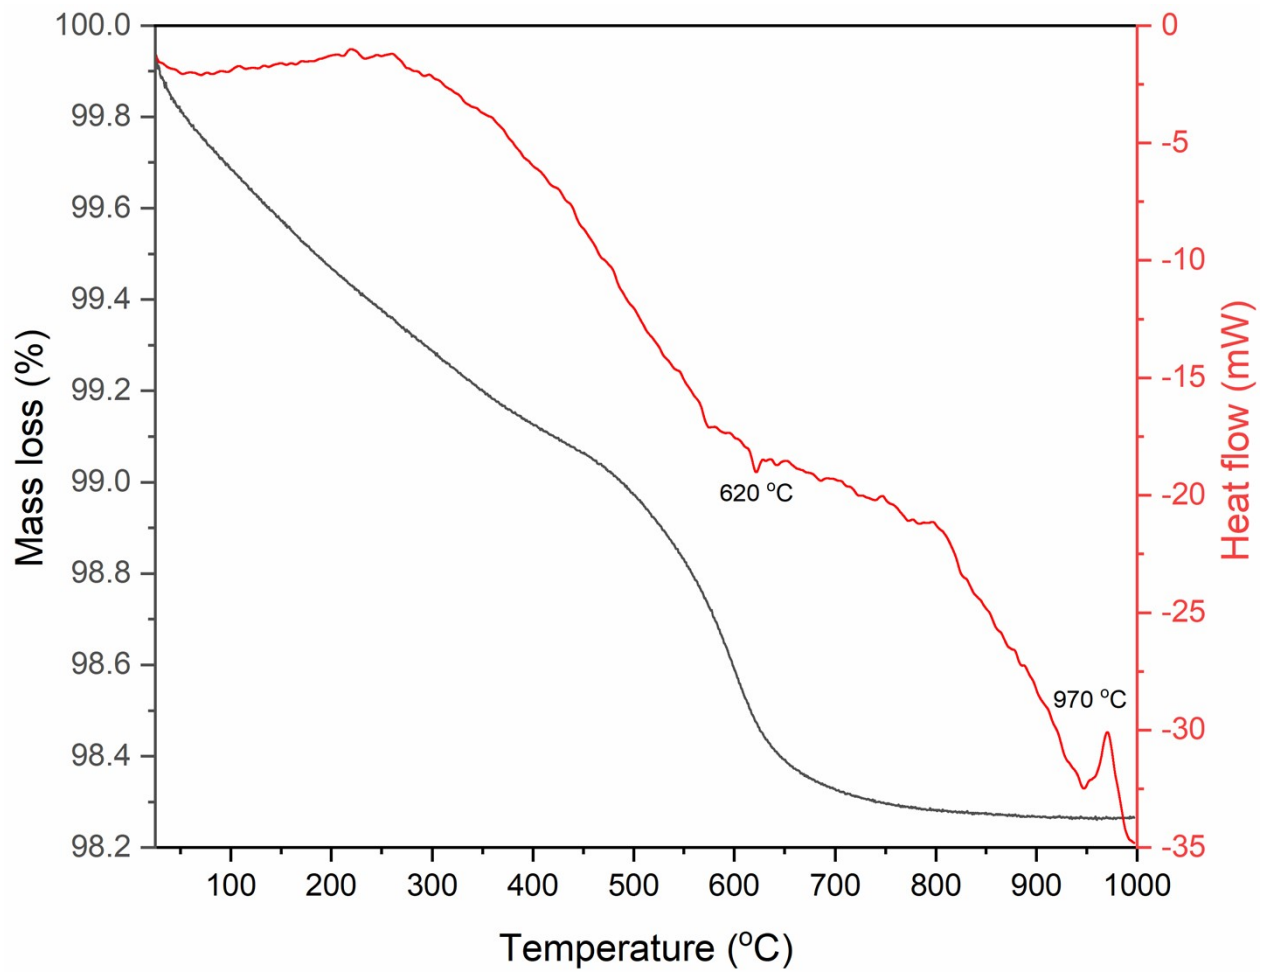

Figure S3. TGA-DSC curves of metakaolin
